# Supplementary material for: Efficient CRISPR/Cas9 Plasmids for Rapid and Versatile Genome Editing in Drosophila
Source: PubMed Central journal article supplement (PMC4232553; doi:10.1534/g3.114.014126), 2014-09-17
Supplement: supp_g3.114.014126_FileS1.pdf [file supp_g3.114.014126_FileS1.pdf]

## File S1

### Supplementary Information

#### gRNA sequences

|              |                      |                            |
|--------------|----------------------|----------------------------|
| <i>e</i>     | GCCACAATTGTCGATCGTCA | (Port <i>et al.</i> 2014)  |
| <i>y</i>     | GCGATATAGTTGGAGCCAGC | (Gratz <i>et al.</i> 2014) |
| <i>w</i>     | CCGAGAACCTCACCTATGCC |                            |
| <i>MED27</i> | CTCCTCGCCGCTCTCCCCAT |                            |
| <i>ham</i>   | GGCCATTACAATAAGCTCTT |                            |
| <i>dpn</i>   | CCTGTGCGGTTGATCTACCA |                            |
| <i>mγ</i>    | GTGAAGTAATCCTATCTACC |                            |

#### Sequences of recovered indel alleles

*e*

|                                                                          |        |
|--------------------------------------------------------------------------|--------|
| <b>ATGGGTT</b> CGCT <b>GCCACAATTGTCGATCGTCA</b> AGGGTCTGCAGCAAGACTT      | wt     |
| ATGGGTT <b>CGCTGCCACAATTGTCGATC</b> - TCAAGGGTCTGCAGCAAGACTT             | - 1    |
| ATGGGTT <b>CGCTGCCACAATTGTC</b> - - - - - TGCAGCAAGACTT                  | - 14   |
| ATGGGTT <b>CGCTGCCACAATTGTCGA</b> - - - - CAAGGGTCTGCAGCAAGACTT          | - 4    |
| ATGGGTT <b>CGCTGCCACAATTGT</b> - - - - - <b>GTCA</b> AGGGTCTGCAGCAAGACTT | - 5    |
| ATGGGTT <b>CGCTGCCA</b> - - - - - AGGGTCTGCAGCAAGACTT                    | - 16   |
| ATGGGTT <b>CGCTGCCAC</b> - - - - - <b>A</b> AGGGTCTGCAGCAAGACTT          | - 14   |
| ATGGGTT <b>CGCTGCCACAATTGTCGATC</b> - - - - - TGCAGCAAGACTT              | - 10   |
| ATGGGTT <b>CGCTGCCACAATTGTCGATC</b> - tgcaaga - CTGCAGCAAGACTT           | - 9/+7 |
| ATGGGTT <b>CGCTGCCACAATTGTCGATCGa</b> TCAAGGGTCTGCAGCAAGACTT             | + 1    |

*MED27*

|                                                                       |       |
|-----------------------------------------------------------------------|-------|
| GCCGATGGAAC <b>CCGATGGGGAGAGCGGCGAGGAGAGCCG</b>                       | wt    |
| GCCGATGGAAC <b>CCGATG</b> ctcgaacc <b>GAGCGGCGAGGAGAGCCG</b>          | -4/+8 |
| GCCGATGGAAC <b>CCGATG</b> - <b>GGAGAGCGGCGAGGAGAGCCG</b>              | -1    |
| GCCGATGGAAC <b>CCGATG</b> ggagagcggagat <b>GGGAGAGCGGCGAGGAGAGCCG</b> | +13   |

## ssODN donor sequences

The homology arms are in upper case, the central V5 sequence in lower case, and the stop codons underlined. The gRNA target sequences are in bold, and are followed by a PAM (NGG). Silent nucleotide changes were introduced in the standard V5 sequence to create a *HindIII* restriction site. Donor sequences were synthesized in the same orientation as the gRNA. For all cases presented here, the insertion of the V5 tag destroyed the gRNA target site so that V5-tagged chromosomes would not be recognized and cleaved again.

### *ham-V5*

GCAACATCAGCAACAACAACAGCAGCAGCGGCAACAACAACAACAGCTCCA**AGGCCATTACA**  
**ATAAGCTCT**ggtaagcctatacctaaccctcttcttggtctagatagcacg**TAGGAATCGTA**  
AGAGATTAGAGAGCTTGCTTTCCTCGTTGTTAAATGATAAACTTACTTTAACTC

### *dpn-V5*

GCAATGAAATAAATTAACAATGTATAAACGTAACATAGAAGTGG**CCTGTGCGGTTGATCTA**c  
gtgctatctagaccaagaagagggttaggtataggcttacc**CCAC**GGCCTCCAAGCGGAGCT  
CGACTTTTCGATGGCGCCAGCTAGGAATTTCTTGGACGAGGGC

### *m $\gamma$ -V5*

CTTTCTATGATCTCTCCTTCGTTTTTTTTTTTTTTCAGTTGTGGT**GTGAAGTAATCCTATCTA**  
cgtgctatctagaccaagaagagggttaggtataggcttacc**CCAGGGACGCCAGACGTTCT**  
CCTCGTCCTCGCTGTCGTCCTCCATCTTGGTCACATCGATGGTGGTC
